# Supplementary material
Source: PubMed Central journal article supplement (PMC4255415)
Supplement: CJN.11791113_CJN11791113SupplementaryData.pdf [file CJN.11791113_CJN11791113SupplementaryData.pdf]

**SUPPLEMENTAL DATA**

**Table A. Physical function: mean change from baseline by group using last observation carried forward method**

|                                                        | <b>UC Group</b> | <b>RRE Group</b> |                |
|--------------------------------------------------------|-----------------|------------------|----------------|
|                                                        | <b>(n=48)</b>   | <b>(n=59)</b>    | <b>P-value</b> |
| <b>6-minute walk test (feet, mean±SD)</b>              | -9.7 ±215       | 161 ±249         | <0.001         |
| <b>Sit-to-stand test (% of age predicted, mean±SD)</b> | 0.7 ±11.8       | 20.9 ±26.3       | <0.001         |
| <b>Gait speed test (cm/seconds, median [IQR])</b>      | 0 (-9 - 12.5)   | 0 (-26 - 28)     | 0.83           |

**Table B. Health-related quality of life: mean change from baseline by group using last observation carried forward method**

|                            | <b>UC Group</b> | <b>RRE Group</b> |                |
|----------------------------|-----------------|------------------|----------------|
| <b>Measure</b>             | <b>(n=48)</b>   | <b>(n=59)</b>    | <b>P-value</b> |
| <b>Physical Measures</b>   |                 |                  |                |
| Role functioning/Physical  | -8.3            | 15.4             | <0.01          |
| Physical functioning       | -0.6            | 9.2              | <0.01          |
| Energy/fatigue             | 0.5             | 8.1              | 0.02           |
| General health             | -1.1            | 4.0              | 0.04           |
| <b>Mental Measures</b>     |                 |                  |                |
| Pain                       | -3.6            | 4.7              | 0.05           |
| Emotional wellbeing        | -0.4            | 3.4              | 0.22           |
| Social functioning         | 1.6             | 3.4              | 0.65           |
| Role functioning/emotional | 1.8             | 5.6              | 0.46           |
